# Supplementary material
Source: publisher figshare collection journal article supplement (https://future-science-group.figshare.com/ndownloader/files/25265765)
Supplement: Supplementary file 1 [file 25265765]

## Sheet: Supplementary table
Protocol	# Em.	DNA length	Remove oil	Chl:Oil	n-Octane	PFO	IPA	TE	CIAA wash	LN2	DNA₁ (ng)	DNA₂ (ng)	average DNA₂ (ng)	SD (DNA₂)	CV	% DNA₂	average % DNA₂	SD (%)
Chloroform	1	variable	yes	>2	NA	NA	NA	yes	yes	NA	516	186.196	285.628	92.8842	0.325193	36.0845	55.3542	18.0008
Chloroform	1	variable	yes	>2	NA	NA	NA	yes	yes	NA	516	300.524	285.628	92.8842	0.325193	58.2411	55.3542	18.0008
Chloroform	1	variable	yes	>2	NA	NA	NA	yes	yes	NA	516	370.164	285.628	92.8842	0.325193	71.7372	55.3542	18.0008
Silica	1	variable	NA	NA	NA	no	yes	yes	NA	NA	516	174.968	186.968	11.4473	0.0612258	33.9085	36.2341	2.21846
Silica	1	variable	NA	NA	NA	no	yes	yes	NA	NA	516	197.768	186.968	11.4473	0.0612258	38.3271	36.2341	2.21846
Silica	1	variable	NA	NA	NA	no	yes	yes	NA	NA	516	188.168	186.968	11.4473	0.0612258	36.4667	36.2341	2.21846
Chloroform	1	variable	yes	>2	NA	NA	NA	yes	no	NA	444	120.42	120.616	63.6292	0.527537	27.1216	27.1657	14.3309
Chloroform	1	variable	yes	>2	NA	NA	NA	yes	no	NA	444	280.8	120.616	63.6292	0.527537	63.2432	27.1657	14.3309
Chloroform	1	variable	yes	>2	NA	NA	NA	yes	no	NA	444	84.78	120.616	63.6292	0.527537	19.0946	27.1657	14.3309
Chloroform	1	variable	yes	>2	NA	NA	NA	yes	no	NA	444	86.4	120.616	63.6292	0.527537	19.4595	27.1657	14.3309
Chloroform	1	variable	yes	>2	NA	NA	NA	yes	no	NA	444	85	120.616	63.6292	0.527537	19.1441	27.1657	14.3309
Chloroform	1	variable	yes	>2	NA	NA	NA	yes	no	NA	444	135.54	120.616	63.6292	0.527537	30.527	27.1657	14.3309
Chloroform	1	variable	yes	>2	NA	NA	NA	yes	no	NA	444	87.36	120.616	63.6292	0.527537	19.6757	27.1657	14.3309
Chloroform	1	variable	yes	>2	NA	NA	NA	yes	no	NA	444	79.92	120.616	63.6292	0.527537	18	27.1657	14.3309
Chloroform	1	variable	yes	>2	NA	NA	NA	yes	no	NA	444	125.32	120.616	63.6292	0.527537	28.2252	27.1657	14.3309
Chloroform	1	variable	yes	2	NA	NA	NA	yes	no	NA	444	181.2	196.6	21.7789	0.110778	40.8108	44.2793	4.90516
Chloroform	1	variable	yes	2	NA	NA	NA	yes	no	NA	444	212	196.6	21.7789	0.110778	47.7477	44.2793	4.90516
Chloroform	1	variable	yes	>2	NA	NA	NA	yes	no	NA	310	170.912	101.788	56.8141	0.558164	55.1329	32.8347	18.3271
Chloroform	1	variable	yes	>2	NA	NA	NA	yes	no	NA	310	62.146	101.788	56.8141	0.558164	20.0471	32.8347	18.3271
Chloroform	1	variable	yes	>2	NA	NA	NA	yes	no	NA	310	48.972	101.788	56.8141	0.558164	15.7974	32.8347	18.3271
Chloroform	1	variable	yes	>2	NA	NA	NA	yes	no	NA	310	125.12	101.788	56.8141	0.558164	40.3613	32.8347	18.3271
LN2	2	long	no	NA	NA	NA	NA	yes	NA	yes	20	11.424	13.4248	1.02691	0.0764934	57.12	67.1241	5.13455
LN2	2	long	no	NA	NA	NA	NA	yes	NA	yes	20	13.827	13.4248	1.02691	0.0764934	69.135	67.1241	5.13455
LN2	2	long	no	NA	NA	NA	NA	yes	NA	yes	20	13.8355	13.4248	1.02691	0.0764934	69.1775	67.1241	5.13455
LN2	2	long	no	NA	NA	NA	NA	yes	NA	yes	20	12.837	13.4248	1.02691	0.0764934	64.185	67.1241	5.13455
LN2	2	long	no	NA	NA	NA	NA	yes	NA	yes	20	12.958	13.4248	1.02691	0.0764934	64.79	67.1241	5.13455
LN2	2	long	no	NA	NA	NA	NA	yes	NA	yes	20	14.152	13.4248	1.02691	0.0764934	70.76	67.1241	5.13455
LN2	2	long	no	NA	NA	NA	NA	yes	NA	yes	20	13.547	13.4248	1.02691	0.0764934	67.735	67.1241	5.13455
LN2	2	long	no	NA	NA	NA	NA	yes	NA	yes	20	14.818	13.4248	1.02691	0.0764934	74.09	67.1241	5.13455
Chloroform	3	short	yes	<2	NA	NA	NA	yes	no	NA	95.4	60.4	60.5933	1.06327	0.0175476	63.3124	63.515	1.11453
Chloroform	3	short	yes	<2	NA	NA	NA	yes	no	NA	95.4	59.64	60.5933	1.06327	0.0175476	62.5157	63.515	1.11453
Chloroform	3	short	yes	<2	NA	NA	NA	yes	no	NA	95.4	61.74	60.5933	1.06327	0.0175476	64.717	63.515	1.11453
LN2 (TE)	3	short	yes	NA	NA	NA	NA	yes	NA	yes	95.4	65.12	66.99	1.64265	0.0245208	68.26	70.2201	1.72186
LN2 (TE)	3	short	yes	NA	NA	NA	NA	yes	NA	yes	95.4	68.2	66.99	1.64265	0.0245208	71.4885	70.2201	1.72186
LN2 (TE)	3	short	yes	NA	NA	NA	NA	yes	NA	yes	95.4	67.65	66.99	1.64265	0.0245208	70.9119	70.2201	1.72186
LN2 (oil)	3	short	yes	NA	NA	NA	NA	no	NA	yes	95.4	68.4	62.9333	4.73849	0.0752939	71.6981	65.9679	4.96698
LN2 (oil)	3	short	yes	NA	NA	NA	NA	no	NA	yes	95.4	60	62.9333	4.73849	0.0752939	62.8931	65.9679	4.96698
LN2 (oil)	3	short	yes	NA	NA	NA	NA	no	NA	yes	95.4	60.4	62.9333	4.73849	0.0752939	63.3124	65.9679	4.96698
n-Octane	3	short	yes	NA	yes	NA	NA	yes	NA	NA	95.4	NA	NA	NA	NA	NA	NA	NA
n-Octane	3	short	yes	NA	yes	NA	NA	yes	NA	NA	95.4	NA	NA	NA	NA	NA	NA	NA
n-Octane	3	short	yes	NA	yes	NA	NA	yes	NA	NA	95.4	56.88	NA	NA	NA	59.6226	NA	NA
PFO	3	short	yes	NA	NA	yes	NA	yes	NA	NA	95.4	56.64	55.84	0.780769	0.0139823	59.3711	58.5325	0.818416
PFO	3	short	yes	NA	NA	yes	NA	yes	NA	NA	95.4	55.8	55.84	0.780769	0.0139823	58.4906	58.5325	0.818416
PFO	3	short	yes	NA	NA	yes	NA	yes	NA	NA	95.4	55.08	55.84	0.780769	0.0139823	57.7358	58.5325	0.818416
Chloroform	3	short	yes	<2	NA	NA	NA	yes	no	NA	430.2	238	251.43	13.3704	0.0531774	55.3231	58.4449	3.10795
Chloroform	3	short	yes	<2	NA	NA	NA	yes	no	NA	430.2	251.55	251.43	13.3704	0.0531774	58.4728	58.4449	3.10795
Chloroform	3	short	yes	<2	NA	NA	NA	yes	no	NA	430.2	264.74	251.43	13.3704	0.0531774	61.5388	58.4449	3.10795
Chloroform	3	short	yes	2	NA	NA	NA	yes	no	NA	430.2	208.95	197.555	16.115	0.081572	48.5704	45.9217	3.74592
Chloroform	3	short	yes	2	NA	NA	NA	yes	no	NA	430.2	186.16	197.555	16.115	0.081572	43.2729	45.9217	3.74592
LN2 (TE)	3	short	yes	NA	NA	NA	NA	yes	NA	yes	430.2	279.6	299.883	20.8731	0.069604	64.993	69.7079	4.85195
LN2 (TE)	3	short	yes	NA	NA	NA	NA	yes	NA	yes	430.2	321.3	299.883	20.8731	0.069604	74.6862	69.7079	4.85195
LN2 (TE)	3	short	yes	NA	NA	NA	NA	yes	NA	yes	430.2	298.75	299.883	20.8731	0.069604	69.4444	69.7079	4.85195
Legend:
# Em.	number of emulsion produced by Droplet Generator combined to form a sample replicate
DNA length	DNA fragment lenght
PFO	1H,1H,2H,2H-Perfluoro-1-octanol
IPA	Isopropanol
TE	addition of TE buffer
CIAA wash	Washing step with Chloroform:Isoamyl alcohol (24:1)
LN2	liquid nitrogen
DNA₁ (ng)	Initial DNA
DNA₂ (ng)	total DNA recovered
average DNA₂ (ng)	mean of total DNA recovered
SD (DNA₂)	standard deviation of total DNA recovered
CV	coefficient of variation
% DNA₂	% recovered (per replicate)
average % DNA₂	% recovered (average)
SD (%)	% of StDevp
